# Supplementary material for: Rutile TiO2mesocrystallines with aggregated nanorod clusters: extremely rapid self-reaction of the single source and enhanced dye-sensitized solar cell performance
Source: Royal Society of Chemistry journal article supplement (doi:10.1039/c4ra10104a), 2014-11-07
Supplement: c4ra10104a1.pdf [file c4ra10104a1.pdf]

## Electronic Supplementary Information

### **Rutile TiO<sub>2</sub> mesocrystallines with aggregated nanorod clusters: extremely rapid self-reaction of the single source and enhanced dye-sensitized solar cells performance†**

Hequan Wang,<sup>a</sup> Li Sun,<sup>a</sup> Hai Wang,<sup>\*b</sup> Ling Xin,<sup>a,c</sup> Qiuyue Wang,<sup>c</sup> Yong Liu<sup>c</sup> and Linjiang Wang<sup>b</sup>

<sup>a</sup>*College of Mechanical and Electrical Engineering, Shenyang Aerospace University, Shenyang, 110136, China.*

<sup>b</sup>*Key Laboratory of New Processing Technology for Nonferrous Metals and Materials, Ministry of Education, Guilin University of Technology, Guilin 541004, China. E-mail: hbwanghai@gmail.com, Fax: +86-773-5896-671; Tel: +86-773-5896-672.*

<sup>c</sup>*School of Physics and Engineering, State Key Laboratory of Optoelectronic Materials and Technologies, Sun Yat-sen University, Guangzhou 510275, China.*

## Figure captions

**Fig. S1** High-magnification FESEM of the surface of individual rutile TiO<sub>2</sub> mesocrystalline prepared at 180 °C for 12 h.

**Fig. S2** The FESEM images of RTM at 150 °C for 10 min (a-b) and at 90 °C for 6 h (c-d).

**Fig. S3** Low- and high-magnification FESEM images of the RTM: (a, b) 150 °C, 10 min, (c, d) 150 °C, 48 h and (e, f) 180 °C, 48 h.

**Fig. S4** Low- and high-magnification FESEM images of the free-standing rutile TiO<sub>2</sub> nanorod arrays prepared at different temperatures: (a, b) 120 °C, (c, d) 150 °C and (e, f) 180 °C.

**Fig. S5** The FESEM image (a), TEM image (b-c) and XRD patterns of the RTM treated at 500 °C for 30 min.

**Fig. S6** The comparative transmittance spectra for the P25+mesocrystals composites, P25 and RTM only thin film.

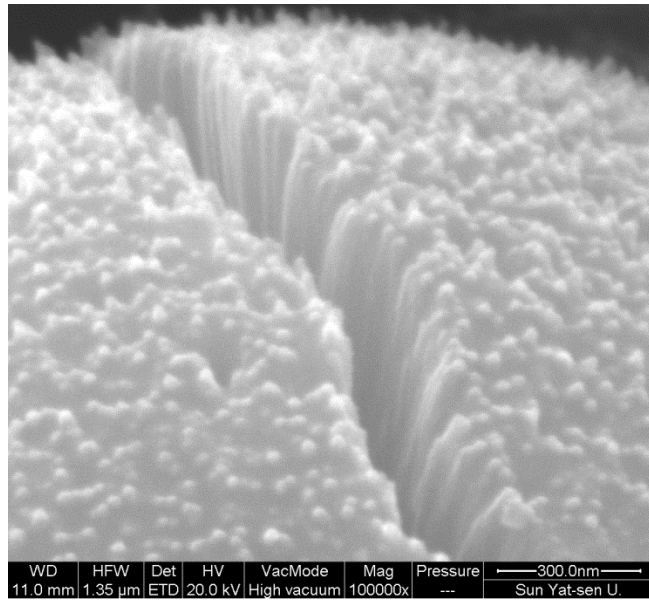

**Fig. S1** High-magnification FESEM of the surface of individual rutile TiO<sub>2</sub> mesocrystalline prepared at 180 °C for 12 h.

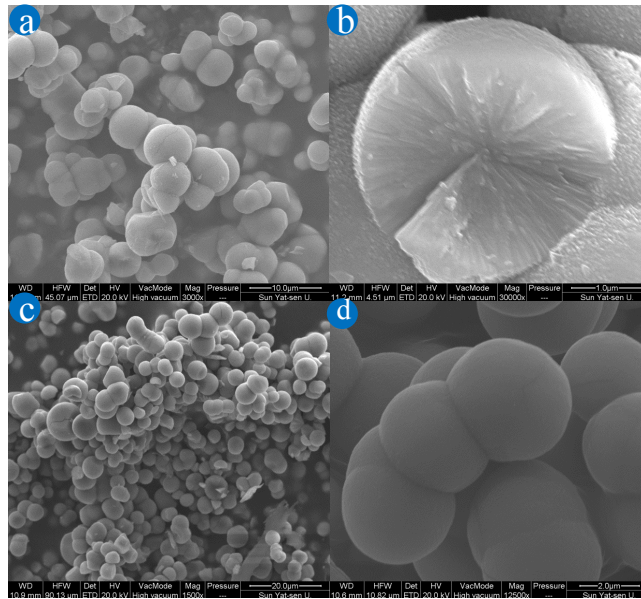

**Fig. S2** The FESEM images of RTM at 150 °C for 10 min (a-b) and at 90 °C for 6 h (c-d).

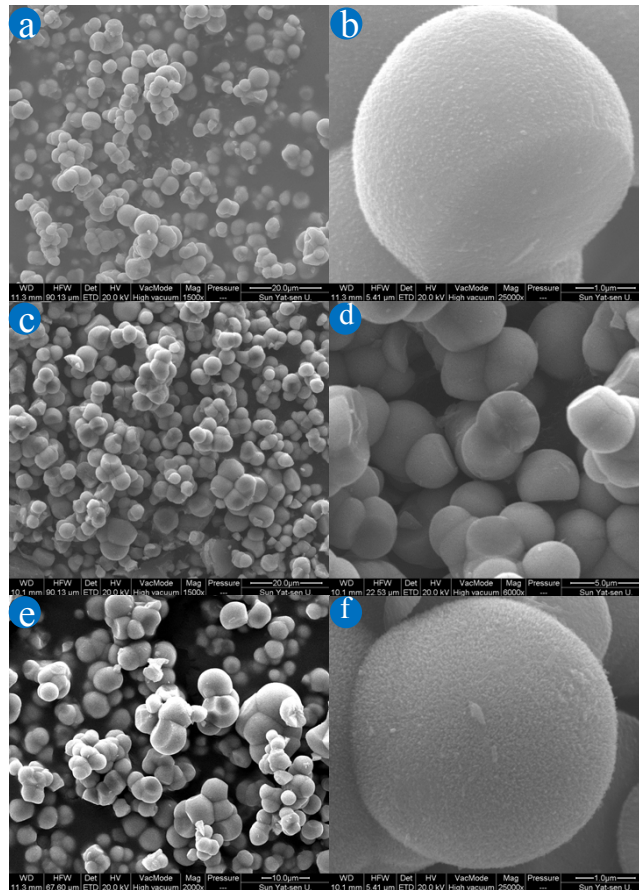

**Fig. S3** Low- and high-magnification FESEM images of the RTM: (a, b) 150 °C, 10 min, (c, d) 150 °C, 48 h and (e, f) 180 °C, 48 h.

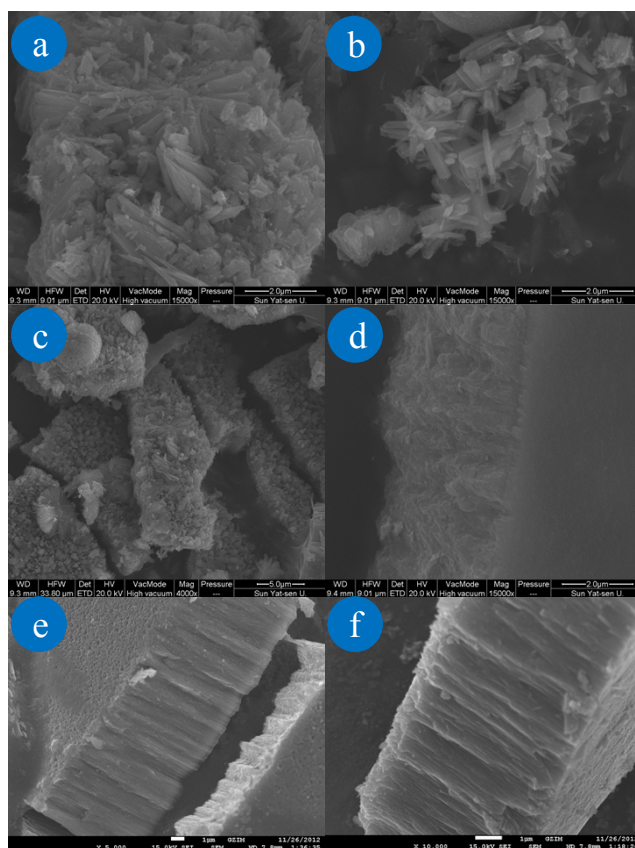

**Fig. S4** Low- and high-magnification FESEM images of the free-standing rutile TiO<sub>2</sub> nanorod arrays prepared at different temperatures: (a, b) 120 °C, (c, d) 150 °C and (e, f) 180 °C.

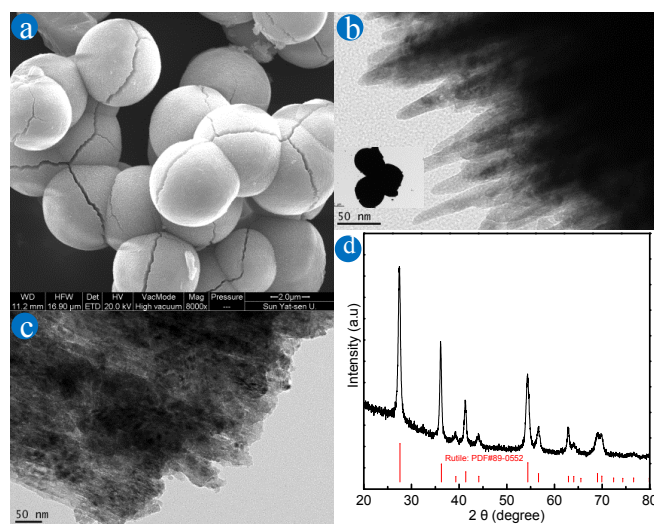

**Fig. S5** The FESEM image (a), TEM image (b-c) and XRD patterns of the RTM treated at 500 °C for 30 min.





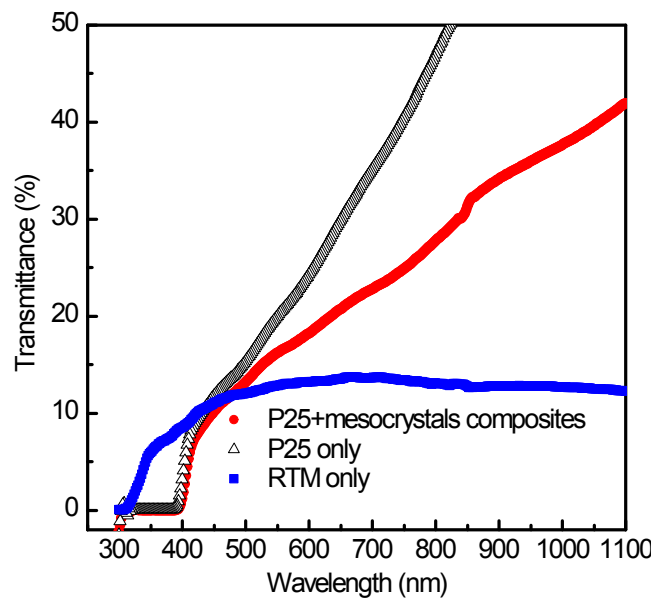

**Fig. S6** The comparative transmittance spectra for the P25+mesocrystals composites, P25 and RTM only thin film.
